# Supplementary material
Source: Springer Nature journal article supplement (https://www.springermedizin.de/resource/supplementary/12891_2013_2242_MOESM1_ESM.pdf/9509772)
Supplement: MOESM1 [file 9509772]

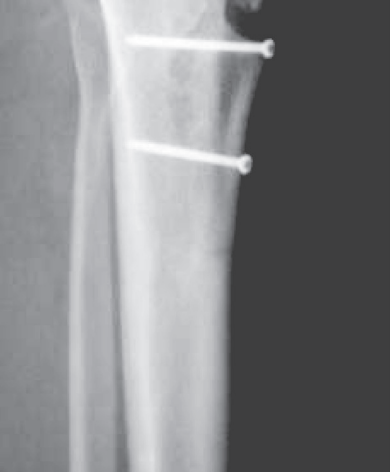

(a)

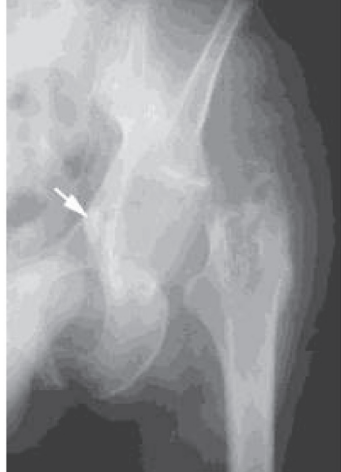

(b)

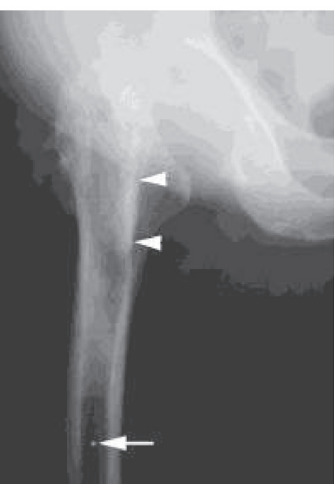

(c)

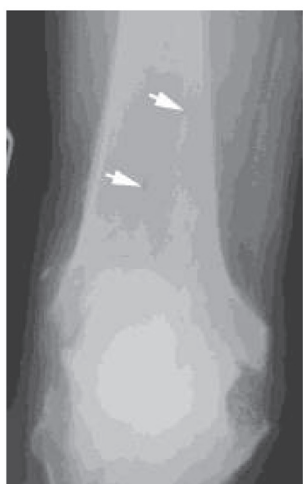

(d)

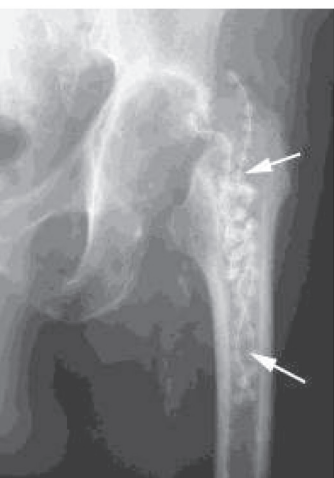

(e)

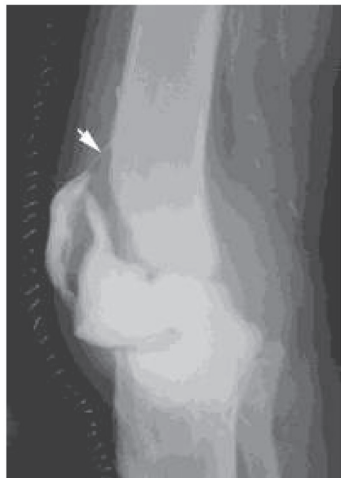

(f)
